# Supplementary material for: Positional motif analysis reveals the extent of specificity of protein-RNA interactions observed by CLIP
Source: PubMed Central journal article supplement (PMC9461102; doi:10.1186/s13059-022-02755-2), 2022-09-09
Supplement: 13059_2022_2755_MOESM1_ESM.pdf [file 13059_2022_2755_MOESM1_ESM.pdf]

Fig S1

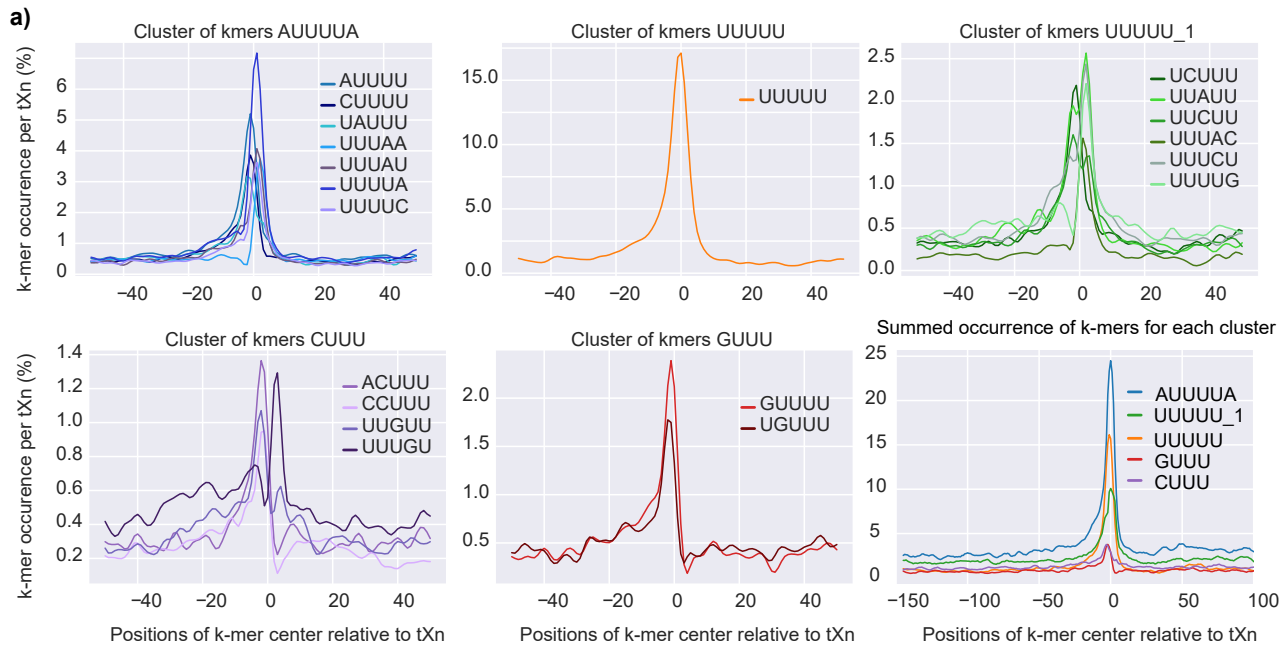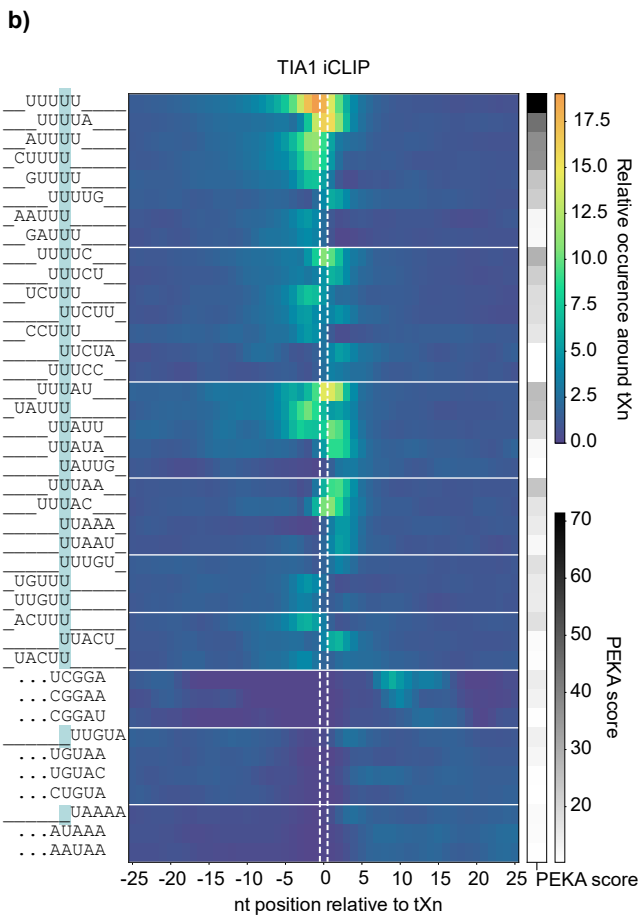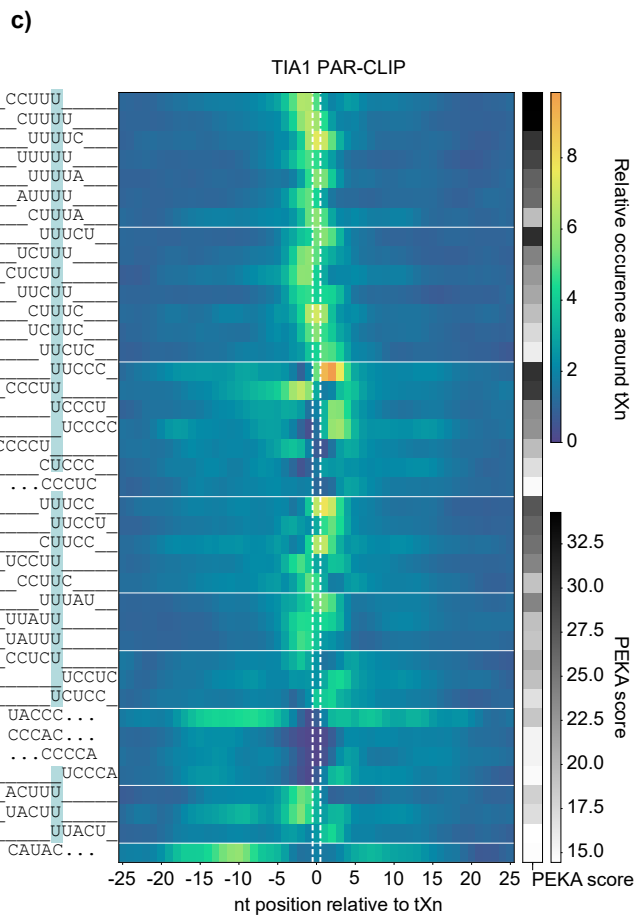

## Fig S1 | Visualisation of PEKA results

**a)** Positional motif clusters of top 20 ranked motifs for TIA1 iCLIP in HeLa cell line. After ranking k-mers based on their PEKA-score, top  $n$  k-mers are clustered, based on their sequence and their occurrence distribution around tXn. Smoothed occurrence profiles for k-mers within each cluster are plotted together on a graph and each cluster is represented by its consensus sequence. The final plot shows summed k-mer occurrences for each cluster to elucidate which k-mer groups dominate the RBP's binding landscape and what is the group's approximate distribution pattern. **b,c)** Heatmaps showing relative k-mer occurrences around tXn for 40 most enriched 5-mers for b) TIA1 iCLIP (HeLa cells) and c) TIA1 PAR-CLIP (HEK293 cells). K-mers are clustered based on their sequence and on the left of the heatmaps, their sequences are aligned with the position of relative occurrence maximum. The blue line which spans across labels highlights the most frequently crosslinked nucleotide in the k-mer.

Fig S2

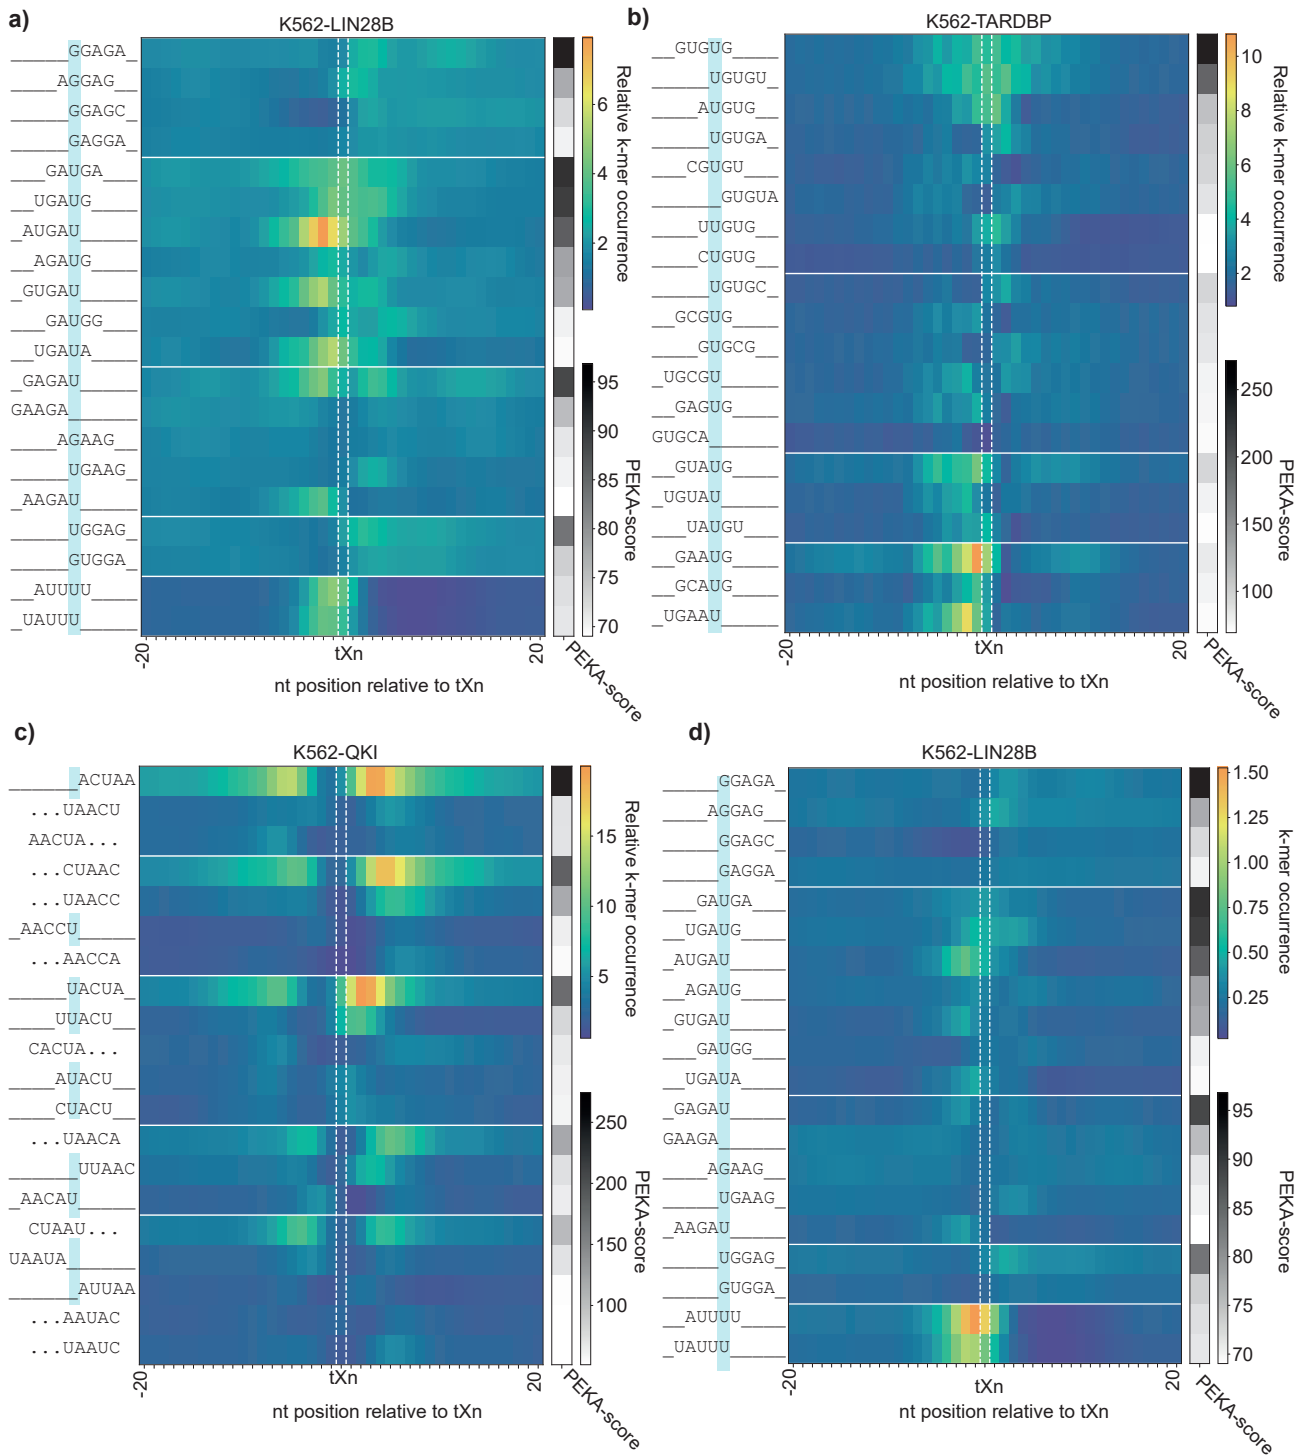

**Fig S2 | PEKA detects different binding modes of RBPs and motifs with complex patterns**

**a, b, c)** Heatmaps of relative k-mer occurrence around tXn for 20 most enriched 5-mers for **a)** LIN28B eCLIP, **b)** TARDBP eCLIP and **c)** QKI eCLIP in K562 cell line. K-mers are clustered based on their sequence and on the left of the heatmaps, their sequences are aligned with the position of relative occurrence maximum. The blue line which spans across labels highlights the most frequently crosslinked nucleotide in the k-mer. **d)** Heatmap of k-mer occurrence around tXn for 20 most enriched 5-mers for LIN28B eCLIP in K562 cell line. K-mers are clustered in the same manner as described for panels a, b and c.

Fig S3

a)

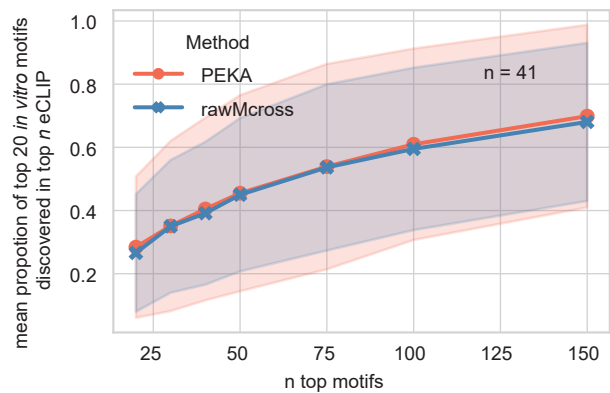

b)

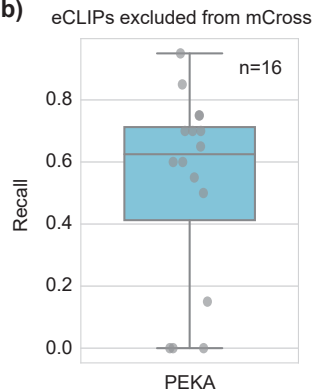

c)

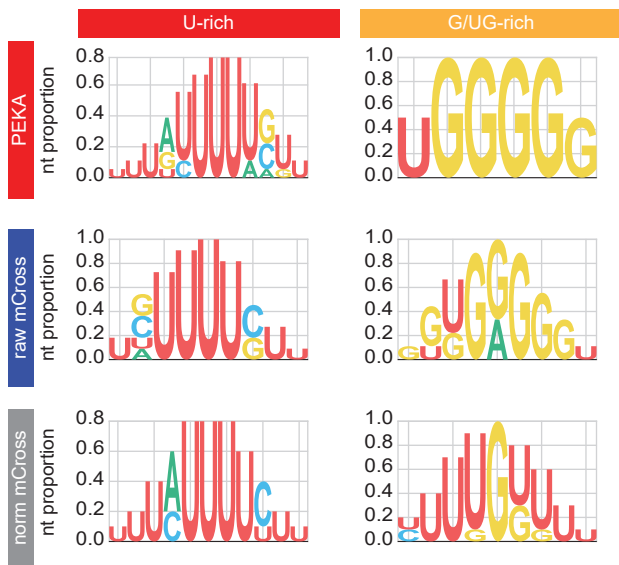

d)

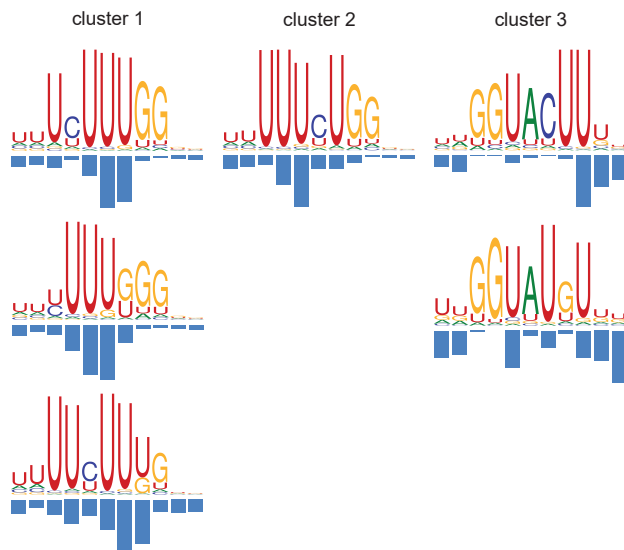

### Fig S3 | Comparison of PEKA and mCross motif analysis.

**a)** Comparison of PEKA and raw mCross in their ability to recover the top 20 motifs from *in vitro* dataset in corresponding eCLIP data. The lines show a mean percentage of top 20 *in vitro* 5-mers that were recovered among the top  $n$  motifs in each method, across 41 eCLIP datasets for which RBNS or RNAC data was available (representing 28 distinct RBPs in total). The shaded area represents the standard deviation across evaluated datasets at a threshold of  $n$  top PEKA/mCross k-mers. **b)** Boxplot of recall values for PEKA analysis of eCLIP datasets that did not yield results in mCross (i.e., mCross result is given as ‘no motif for these datasets’). **c)** k-mer logos for two clusters of top 20 5-mers (see Methods) obtained for TIA1 in HepG2 cell line by PEKA, raw mCross, and normalised mCross. All three approaches to motif analysis retrieved the canonical U-rich TIA1 motifs. PEKA and raw mCross also found the G-rich motifs enriched among the top 20 5-mers, but these were removed by normalisation process, performed by mCross. **d)** Sequence logos for TIA1 eCLIP in HepG2 cell line downloaded from the mCross base [1]. The sequence logos were derived from the top 10 7-mers in the dataset, ranked by normalised mCross z-scores. 7-mers were clustered to produce sequence logos with Stamp [2] as described in [1].

Fig S4

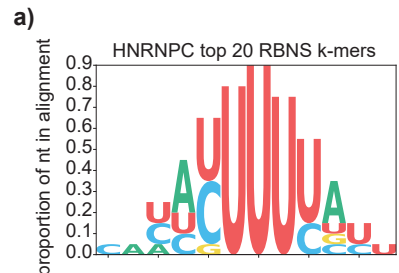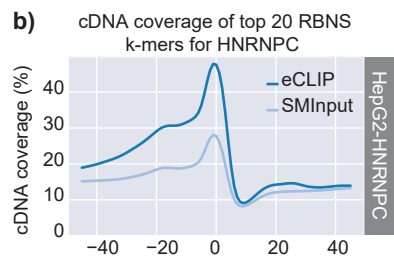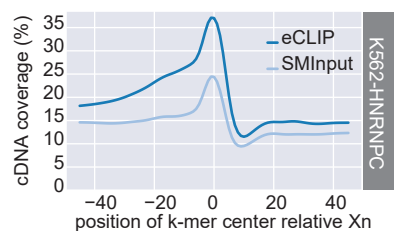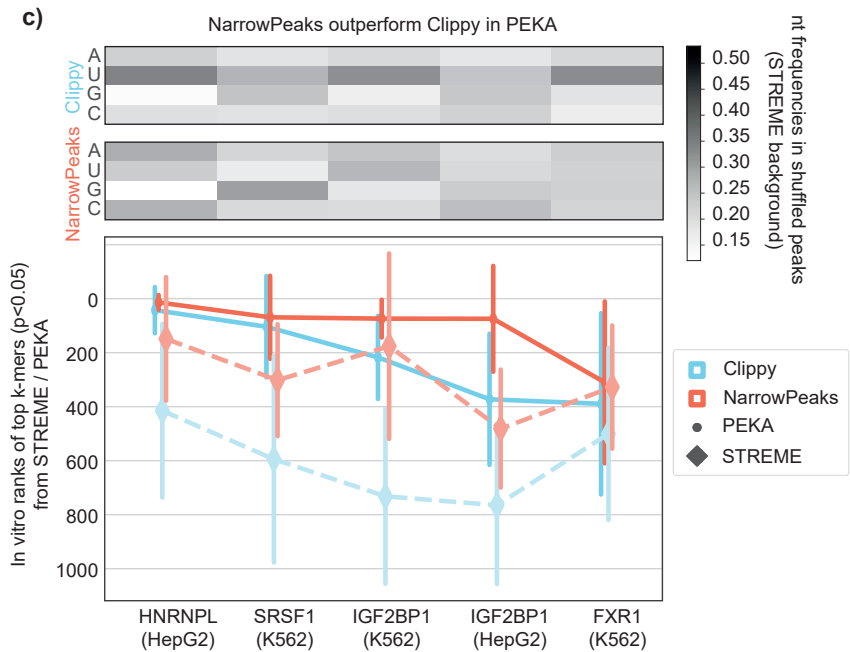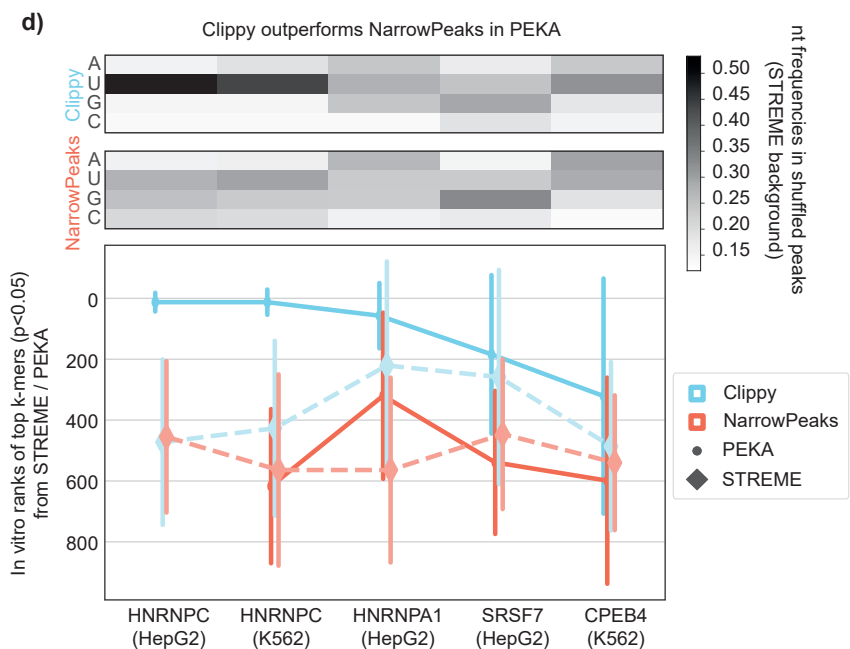

**Fig S4 | Influence of size-matched input controls on motif discovery in PEKA and STREME.**

**a)** K-mer logo shows sequence features of 20 most enriched 5-mers for HNRNPC as ranked by RBNS. **b)** Lineplots show average motif coverage of 20 most enriched 5-mers for HNRNPC (in RBNS) around crosslink sites for HNRNPC eCLIP and SMInput. The top plot shows HNRNPC eCLIP and SMInput in HepG2 cells and the bottom plot shows HNRNPC eCLIP and SMInput K562 cell line. **c, d)** Comparison of motif discovery by PEKA and STREME using either Clippy peaks or narrowPeaks, for five eCLIPs where the use of narrowPeaks c) increased or d) decreased recall the most, when compared to PEKA run with Clippy peaks (results shown in Figure 3). Pointplot shows the median ranking of significantly enriched 5-mers ( $p < 0.05$ ) for each combination of motif discovery method (PEKA / STREME) and peaks (Clippy / narrowPeaks) in the corresponding *in vitro* dataset (Methods). Vertical lines represent the standard deviation. Heatmaps above the pointplot show nucleotide frequencies in shuffled peak sequences that were used as background in STREME with Clippy peaks (top) or narrowPeaks (bottom).



Fig S5

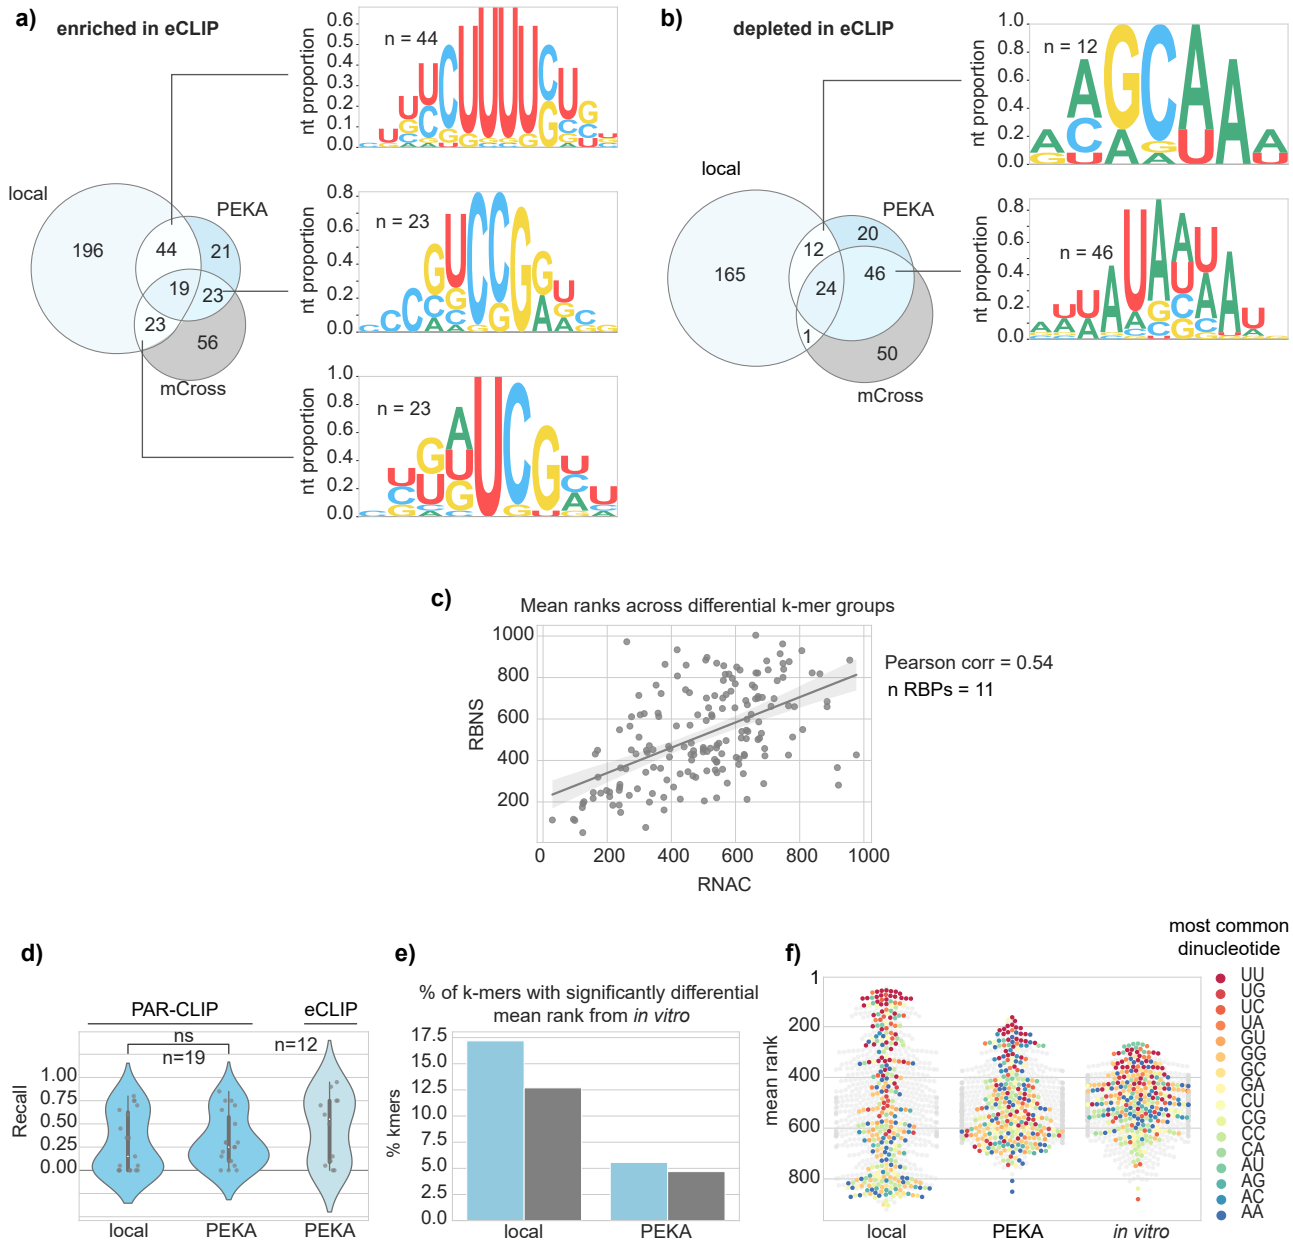

**Fig S5 | Differential enrichment of motif groups in eCLIP and PAR-CLIP relative to *in vitro* methods.**

**a,b)** Venn diagrams show the overlap across groups of 5-mers with significant difference in ranking between *in vitro* and eCLIP, analysed with PEKA, raw mCross, and ‘local’ approach. K-mer groups that were differentially enriched in eCLIP, relative to *in vitro*, are in panel a) and groups of k-mers that were depleted in eCLIP, relative to *in vitro*, are shown in panel b). K-mer logos show characteristics of k-mers contained in each group. Here, we show k-mer logos for groups of k-mers that were not presented in Figure 4 d, e, except for the overlap between the k-mers depleted in ‘local’ approach and raw mCross, which encompasses only 1 k-mer. **c)** Scatterplot shows mean k-mer ranks across differentially ranked motif groups for 11 RBPs that had RNAC and RBNS data available, and also have an overlapping eCLIP dataset. The line represents the regression model fitted to datapoints and the shaded area around the regression line corresponds to the 95% confidence interval for the regression estimate. **d)** Blue violin plots on the left compare recall achieved by PEKA or ‘local’ approach across 19 PAR-CLIP datasets for which *in vitro* data was available. Lightblue violin plot on the right shows recall distribution for 12 RBPs in eCLIP that overlap with PAR-CLIP RBPs (in cases of RBPs where eCLIPs were available for both cell lines, the dataset with higher recall is shown). **e)** Percentage of k-mers with significantly differential ranking (Welch’s t-test  $p < 0.01$  and a fold-change greater than 1.5 or less than 0.66) between PAR-CLIP and *in vitro* for PEKA and ‘local’ approach. Differential ranking was assessed on 19 PAR-CLIP datasets for which *in vitro* data was available. **f)** Swarmplot shows mean k-mer ranks across RBPs (n = 19) in PEKA and ‘local’ approach. K-mers which contain two or more of the same dinucleotide in their sequence are colored by their most common dinucleotide and other k-mers are shown in gray.

Fig S6

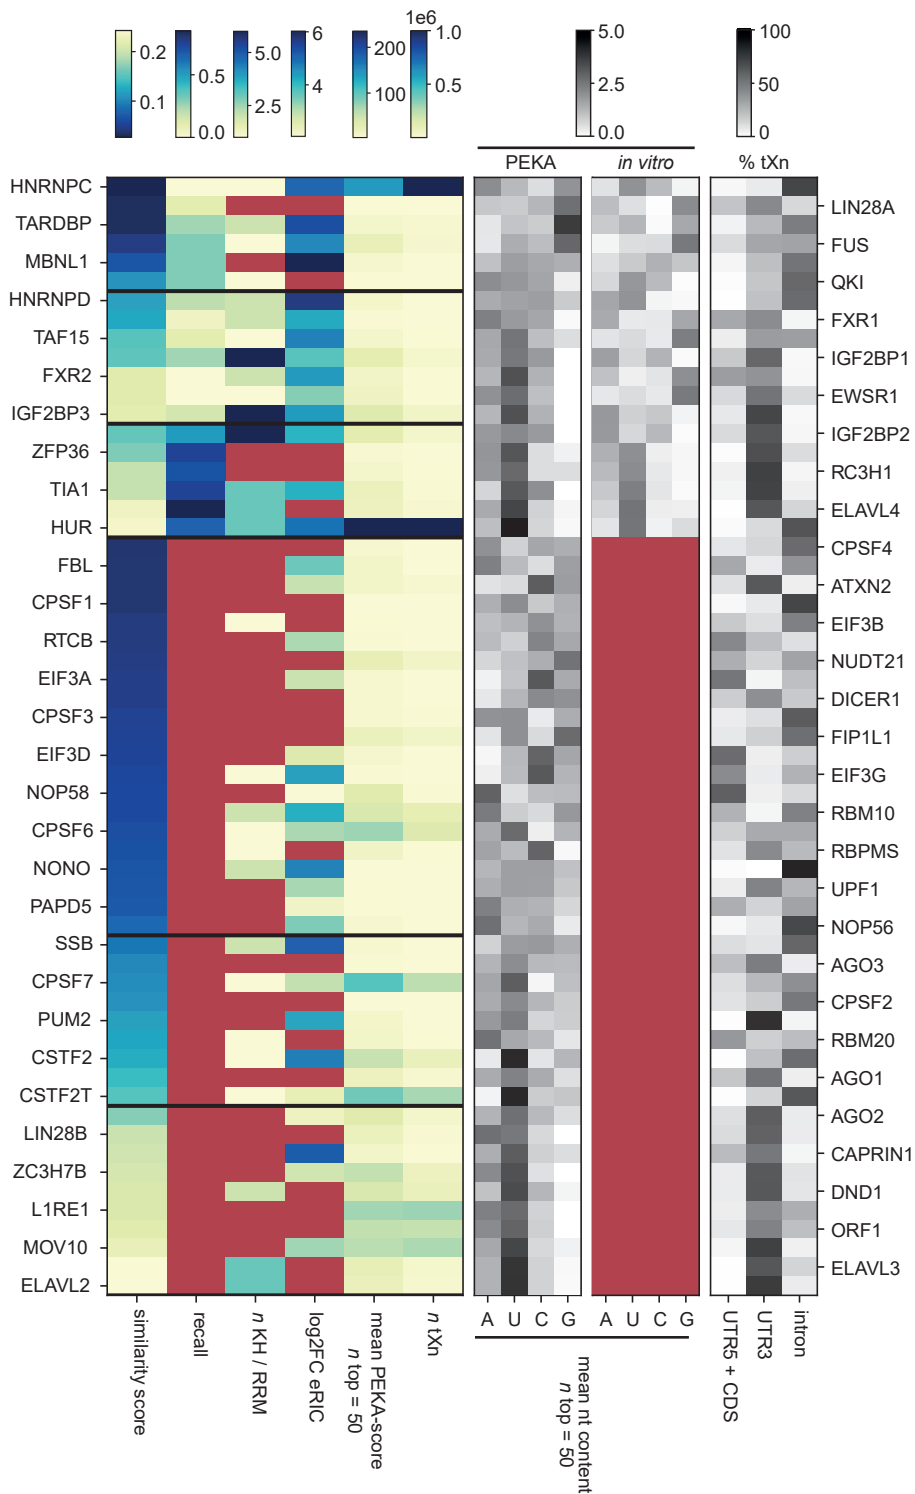

**Fig S6 | Expected specificity of PAR-CLIP datasets with respect to various RBP features.**

Heatmap on the left shows 61 PAR-CLIP datasets, clustered based on their similarity scores and recall into 6 clusters. For each dataset the heatmap also shows its enrichment in the mRNA interactome proteomics (log<sub>2</sub>FC eRIC), the number of KH or RRM in the RBP, the average PEKA-score across the top 50 ranked k-mers, and the number of thresholded crosslinks in the ‘protein-coding gene’ region. Values shown on this heatmap are available in Additional file 9. Grayscale heatmaps from left to right show mean nucleotide content across the top 50 ranked 5-mers for each dataset in PEKA (left) and *in vitro* data (middle) and % of thresholded crosslinks derived from each transcript region (right).

## **Bibliography**

1. Feng H, Bao S, Rahman MA, Weyn-Vanhentenryck SM, Khan A, Wong J, et al. Modeling RNA-Binding Protein Specificity In Vivo by Precisely Registering Protein-RNA Crosslink Sites. *Mol Cell*. 2019;74:1189–204.e6.
2. Mahony S, Benos PV. STAMP: a web tool for exploring DNA-binding motif similarities. *Nucleic Acids Res*. 2007;35:W253–8.
